# Supplementary material
Source: MDPI journal article supplement (https://www.mdpi.com/2072-4292/14/3/600)
Supplement: s1 [file s1]

## Supplementary Materials

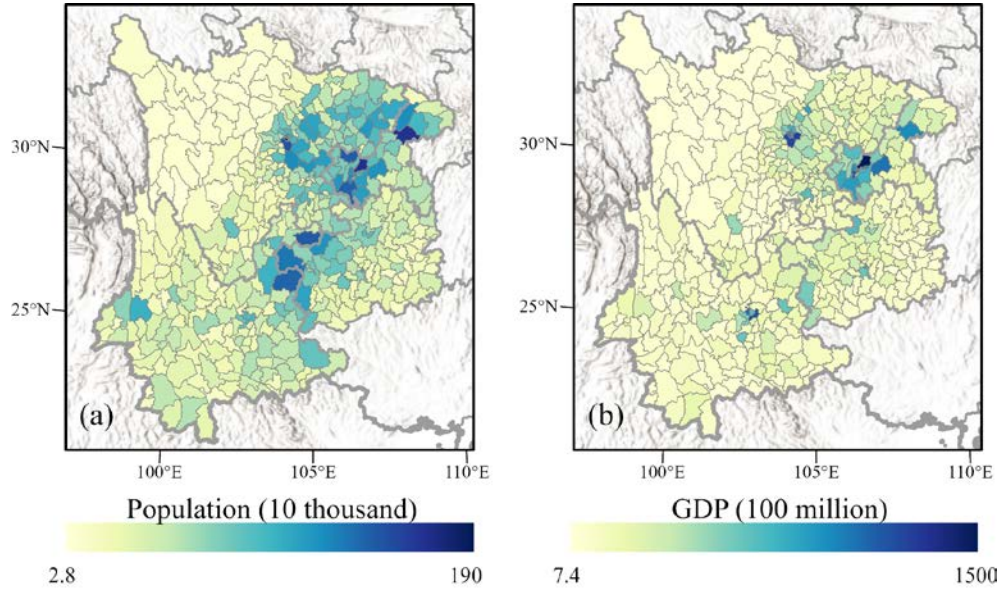

**Figure S1.** The population (a) and GDP (b) of the southwestern China in 2019.

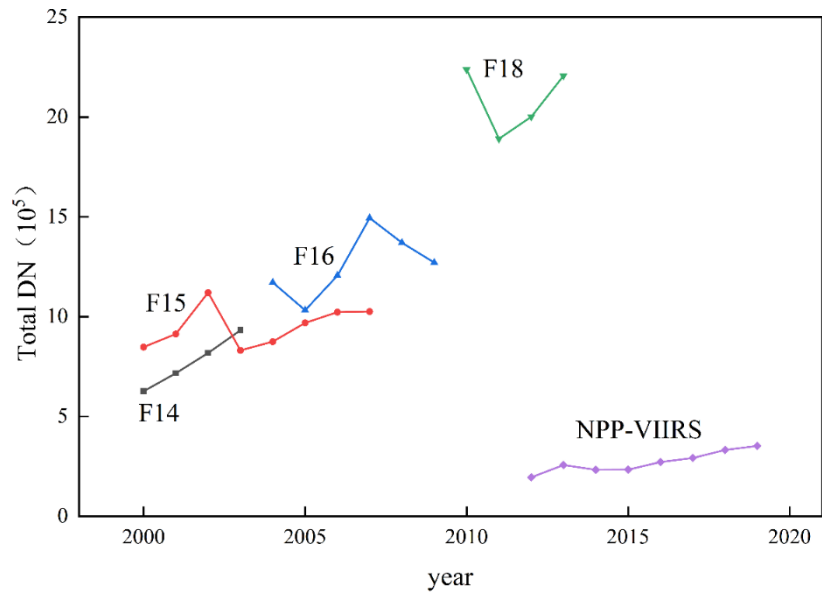

**Figure S2.** The original NTL data from 2000 to 2013 are composed by images from multiple sensors.

**Table S1.** List of PSO-BP algorithm parameter settings.

| Parameter Name                  | Parameter Value |
|---------------------------------|-----------------|
| Learning factor C1              | 2.0             |
| Learning factor C2              | 2.0             |
| maximum iteration number        | 50              |
| population size                 | 20              |
| Inertia factor                  | 0.8             |
| number of neural network layers | 3               |
| number of input layer node      | 4               |

|                             |   |
|-----------------------------|---|
| number of hidden layer node | 5 |
| number of output layer node | 1 |

**Table S2.** Abbreviation in this paper and its description.

| Abbreviation | Description                                                                             |
|--------------|-----------------------------------------------------------------------------------------|
| NTL          | nighttime light                                                                         |
| PSO          | particle swarm optimization                                                             |
| BP           | back propagation                                                                        |
| DMSP-OLS     | the Defense Meteorological Satellite Program's Operational Line Scan System             |
| NPP-VIIRS    | the Suomi National Polar-orbiting Partnership Visible Infrared Imaging Radiometer Suite |
| ACPI         | the actual comprehensive poverty index                                                  |
| ECPI         | the estimated comprehensive poverty index                                               |
| GDP          | gross domestic product                                                                  |
| DN           | digital number                                                                          |
| TDN          | the cumulated total DN values                                                           |
| CV           | coefficient of variation                                                                |
| ANN          | artificial neural network                                                               |
| r            | correlation coefficient                                                                 |
| R2           | the coefficient of determination                                                        |
| RE           | the relative error                                                                      |
| MRE          | the mean relative error                                                                 |
